# Supplementary material for: BAR-based multi-dimensional nonequilibrium pulling for indirect construction of QM/MM free energy landscapes: from semi-empirical to ab initio
Source: Royal Society of Chemistry journal article supplement (doi:10.1039/c9cp04113c), 2019-01-01
Supplement: c9cp04113c1.pdf [file c9cp04113c1.pdf]

**Supporting Information: BAR-based Multi-dimensional Nonequilibrium Pulling  
for Indirect Construction of QM/MM Free Energy Landscape: From  
Semi-empirical to Ab Initio**

Zhaoxi Sun<sup>1,2\*</sup>

*<sup>1</sup>State Key Laboratory of Precision Spectroscopy, School of Chemistry and Molecular Engineering, East China  
Normal University, Shanghai 200062, China*

*<sup>2</sup>Computational Biomedicine (IAS-5/INM-9), Forschungszentrum Jülich, Jülich 52425, Germany*

\*To whom correspondence should be addressed: [z.sun@fz-juelich.de](mailto:z.sun@fz-juelich.de)

**Fig. S1.** a)  $\sigma$  as a function of force constant in AMBER at 300 K in the dihedral case. b)  $\sigma$  varies in the spaces of force constant in AMBER and simulation temperature in the dihedral case.

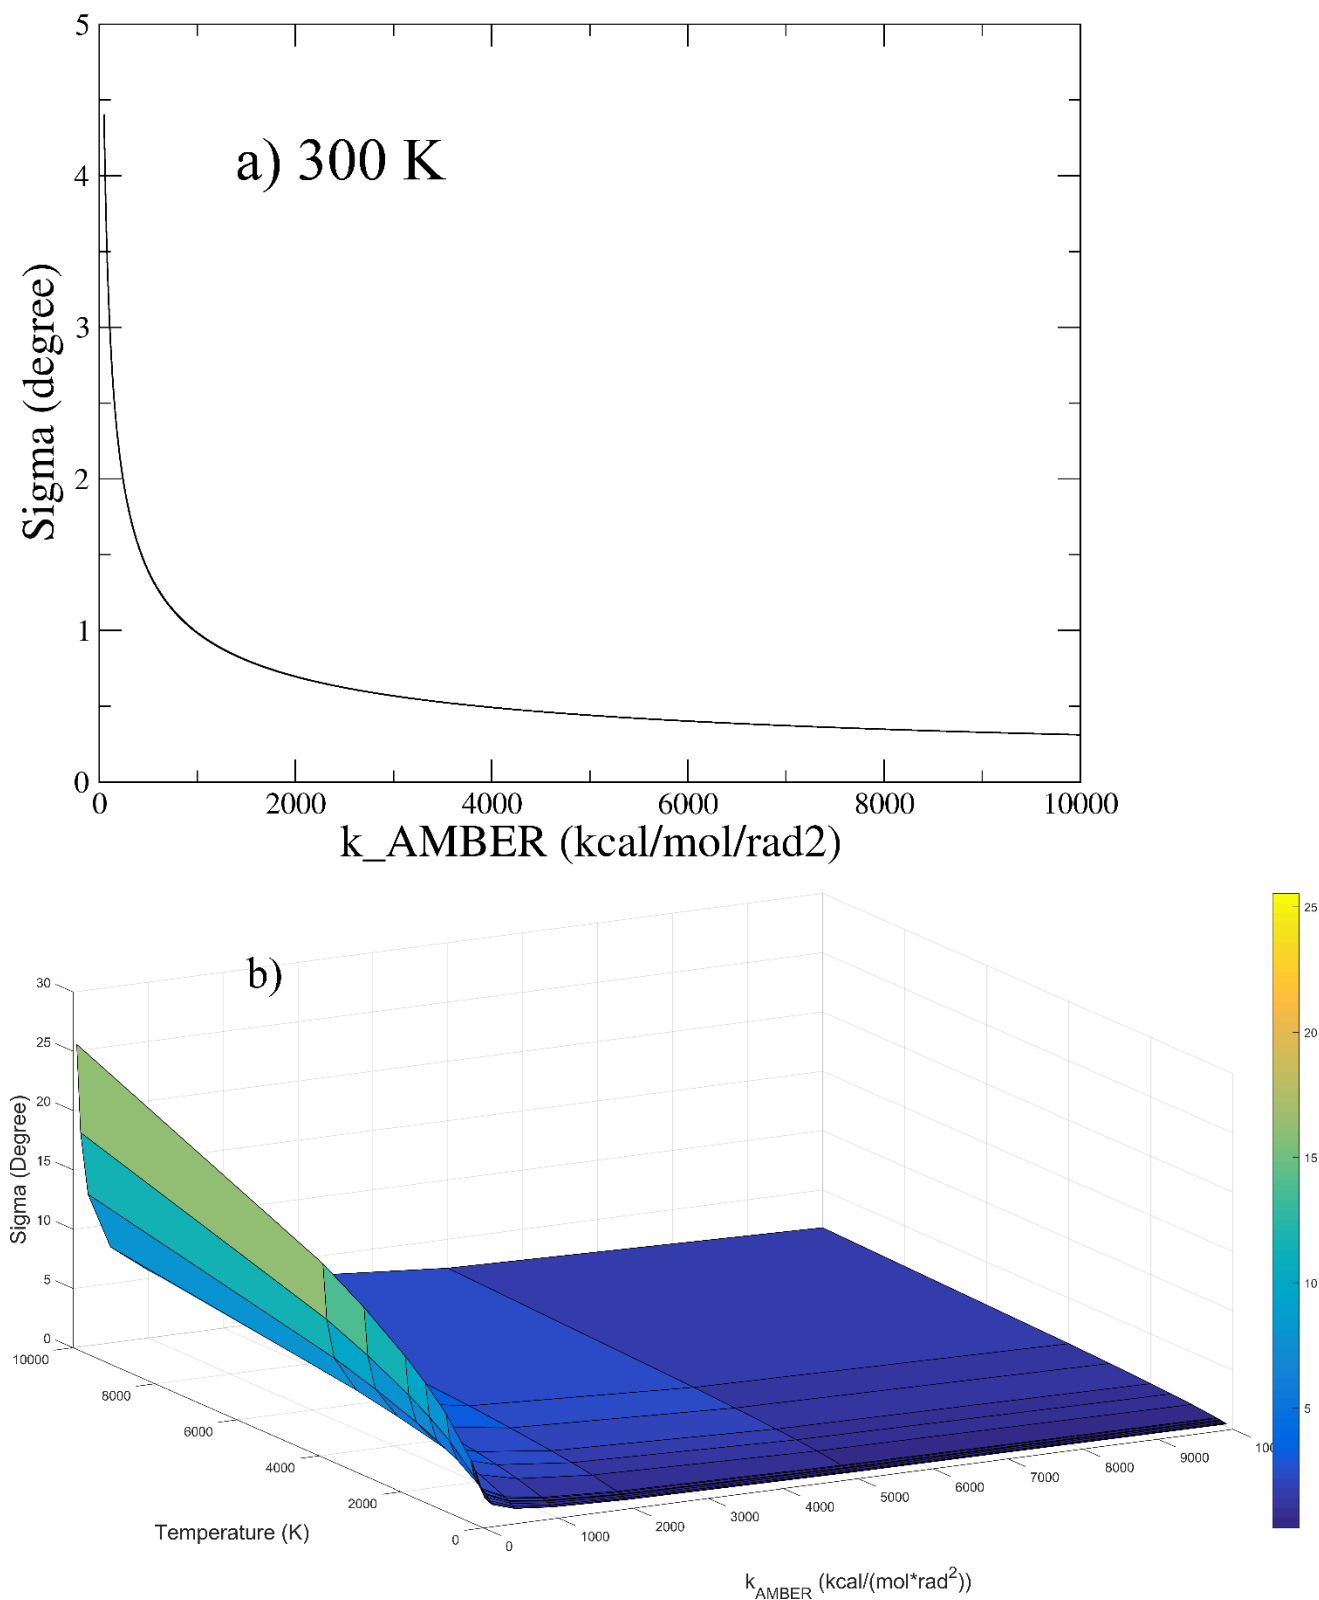

**Fig. S2.** a)  $\sigma$  as a function of force constant in AMBER at 300 K in the distance case. b)  $\sigma$  varies in the spaces of force constant in AMBER and simulation temperature in the distance case.

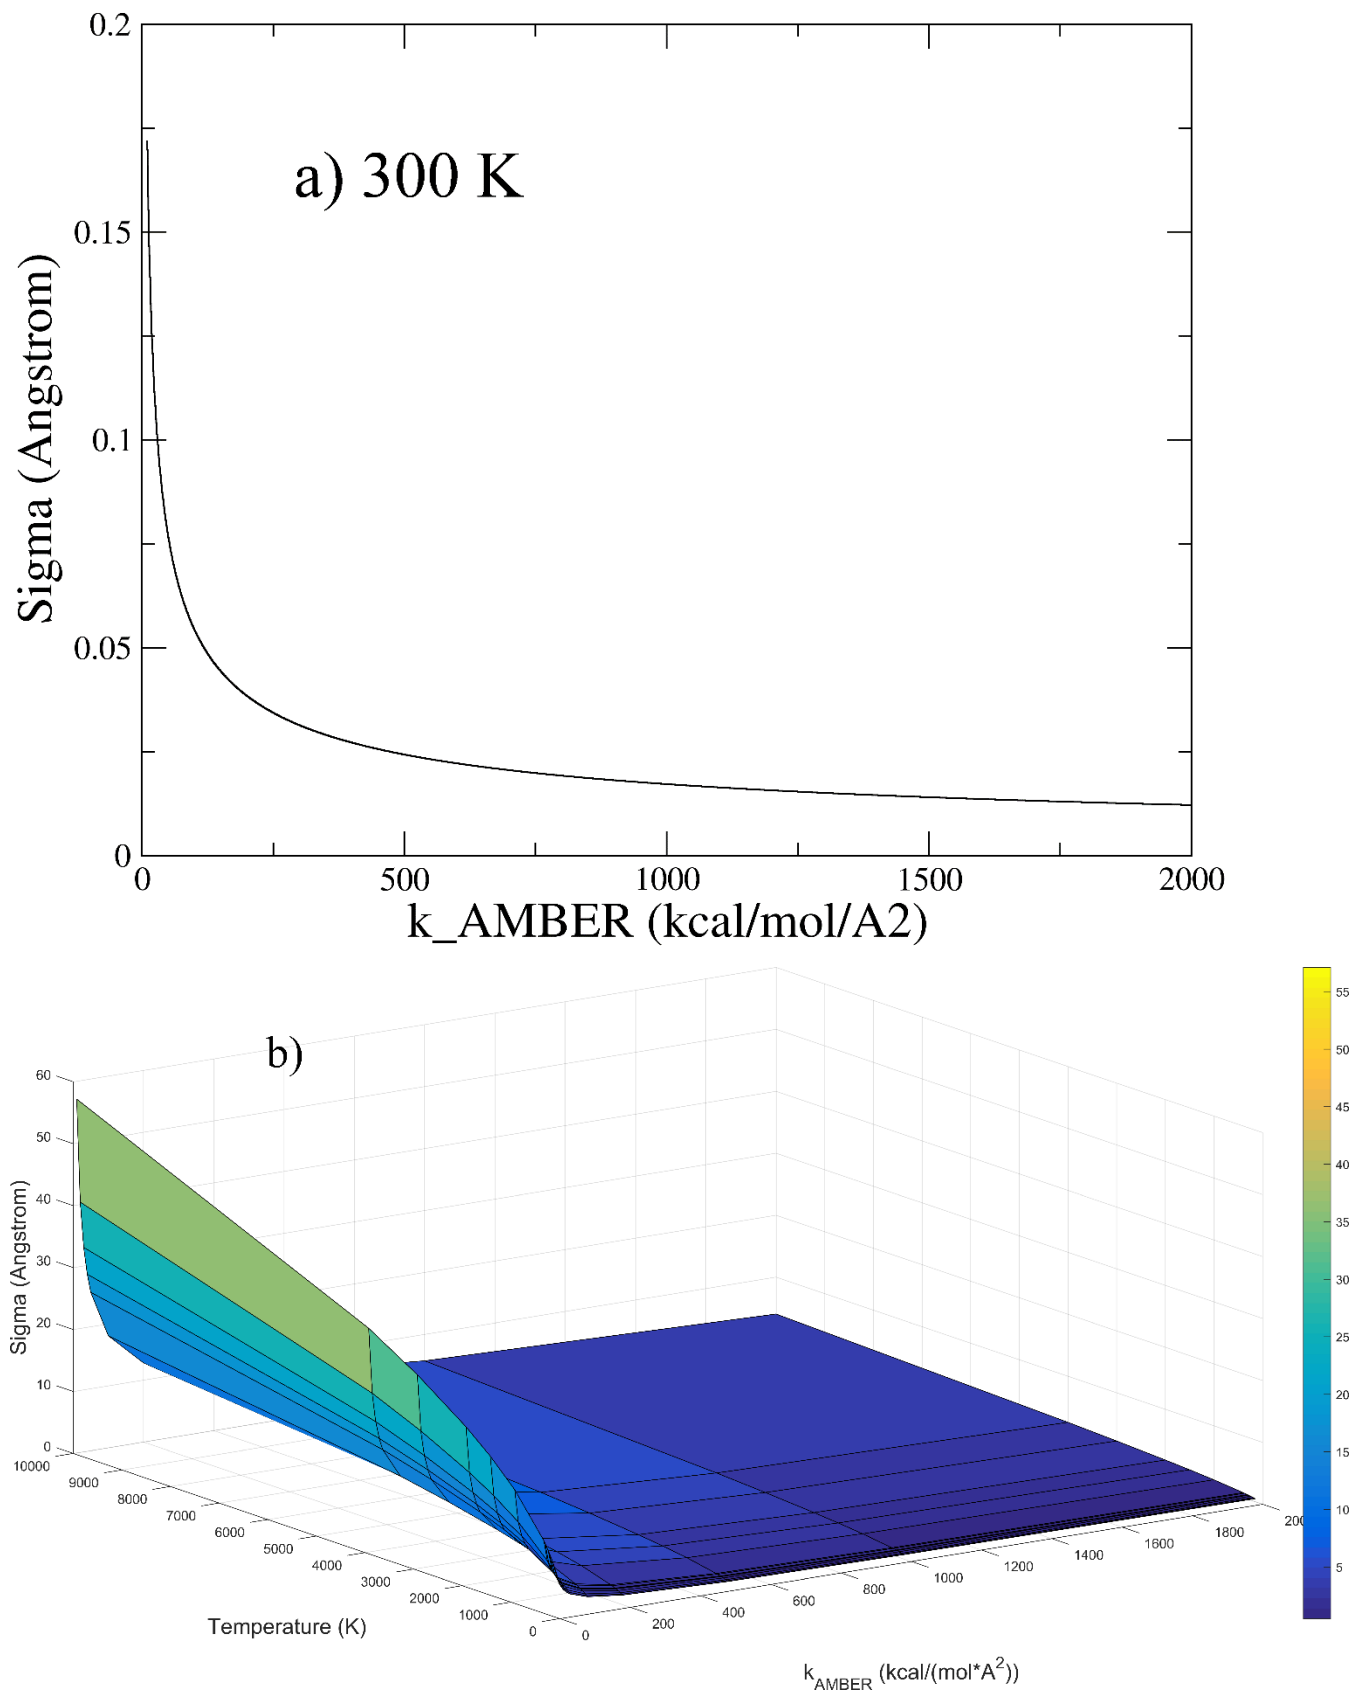

**Fig. S3.** Under different ab initio QM Hamiltonians, the convergence behavior of free energy profiles the pulling speeds at a) HF, b) MP2, c)  $\omega$ B97X-D. The initial sample size is 5 and in each iteration further 5 samples are added to the dataset. The time in the legend represents the pulling time for each  $2^\circ$  segment. From the pulling-speed dependence, we know that 0.5 ps per segment is slow enough for convergence and thus the statistics under this pulling speed is used for discussion in the following parts of the paper.

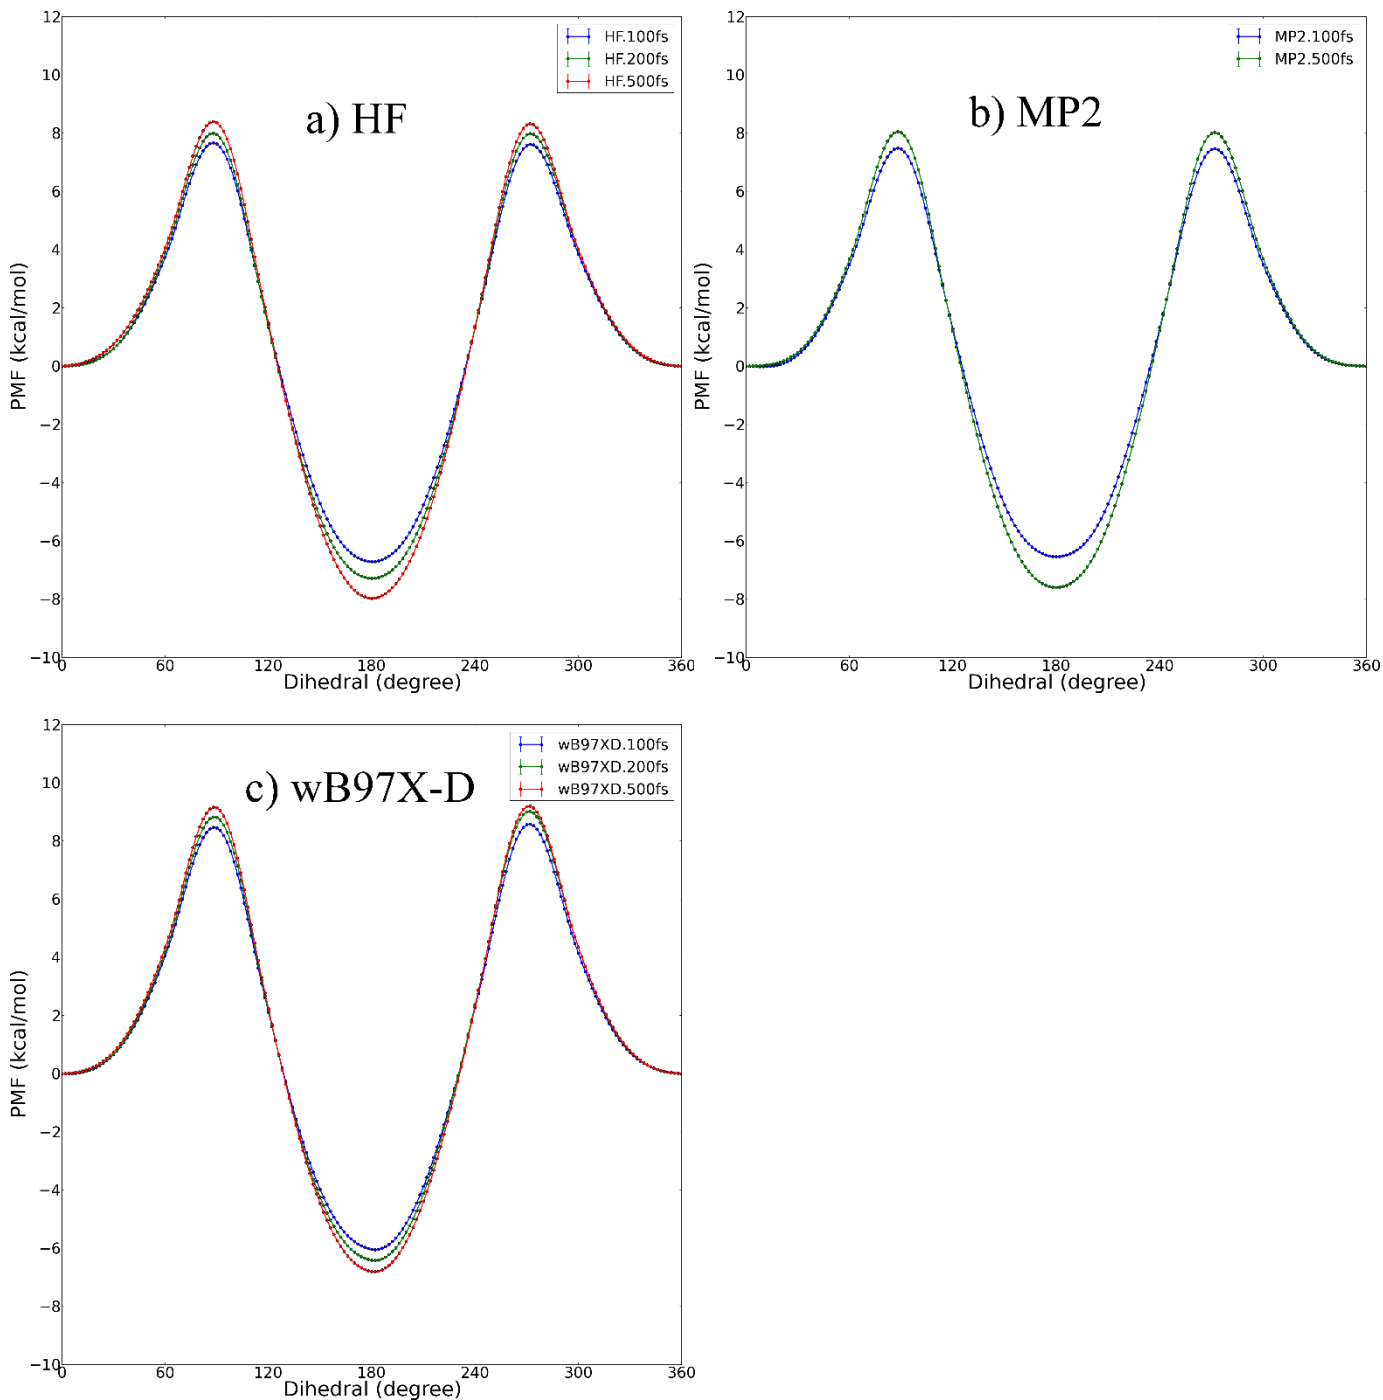

**Fig. S4.** Sample-size dependence of SD profiles for direct free energy simulation at different levels of theory.

a) AM1, b) PM6, c) MNDO, and d) B3LYP.

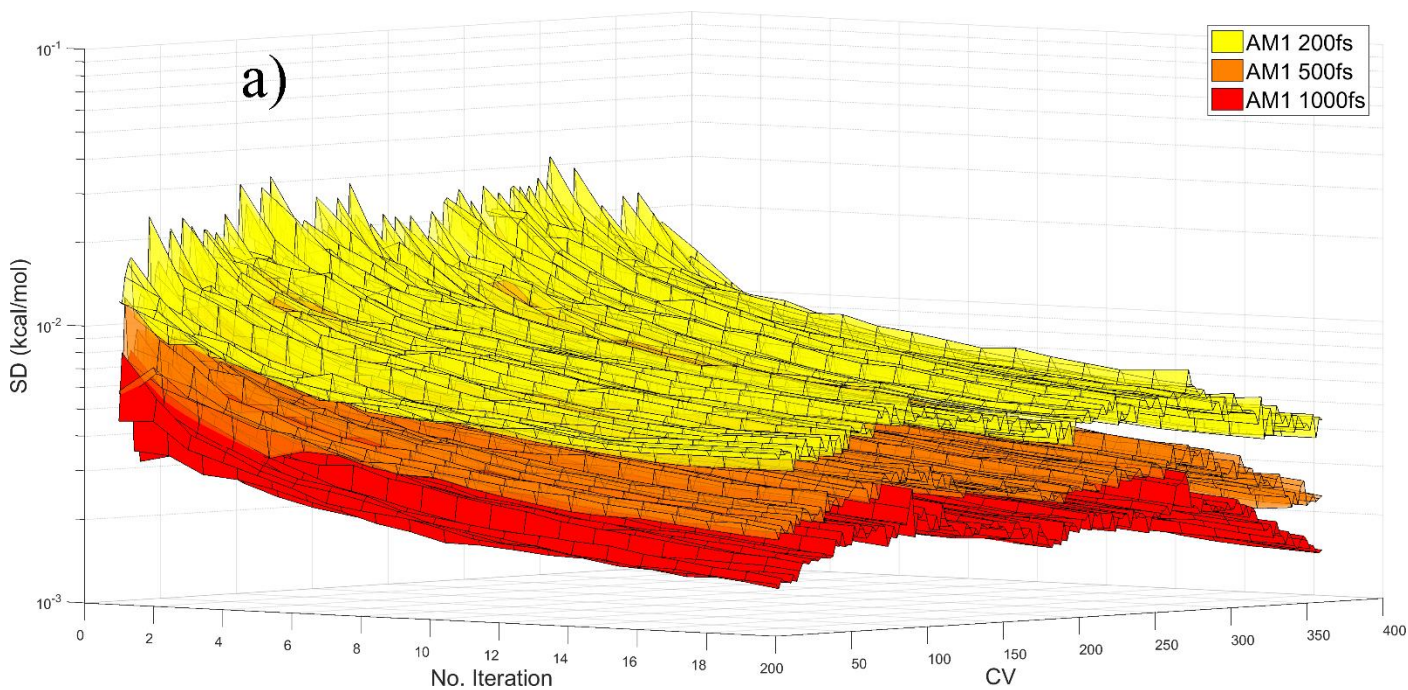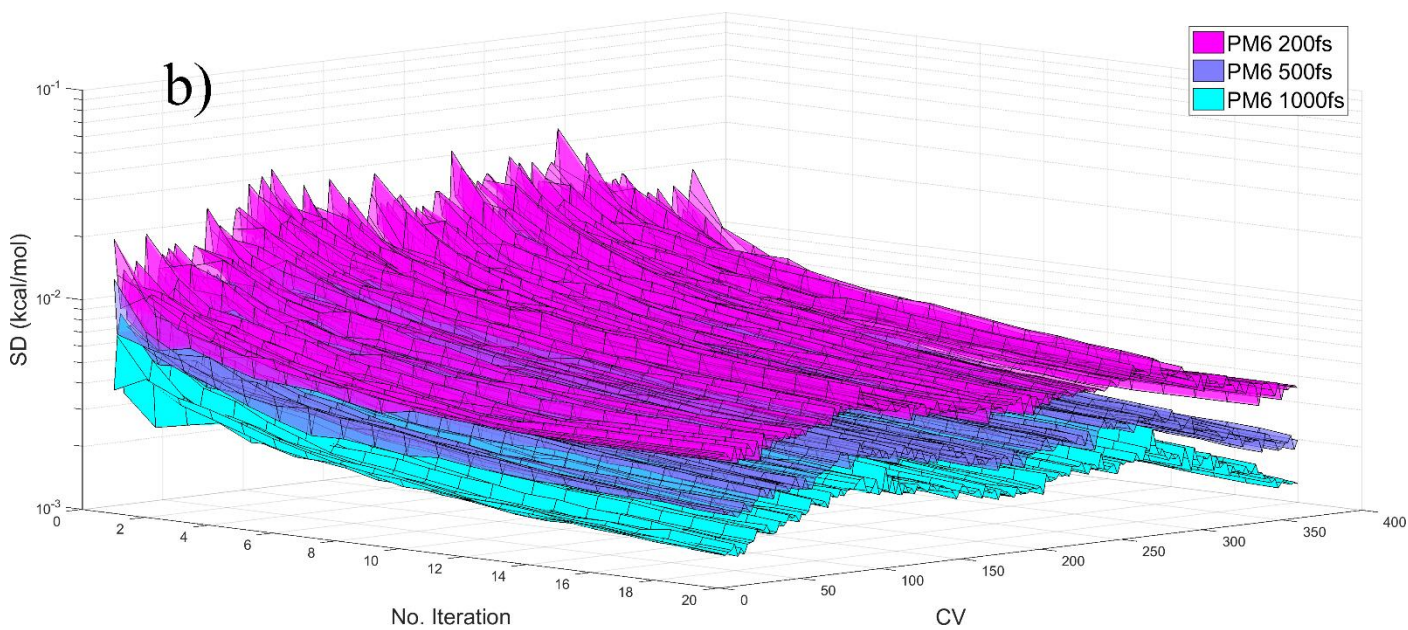

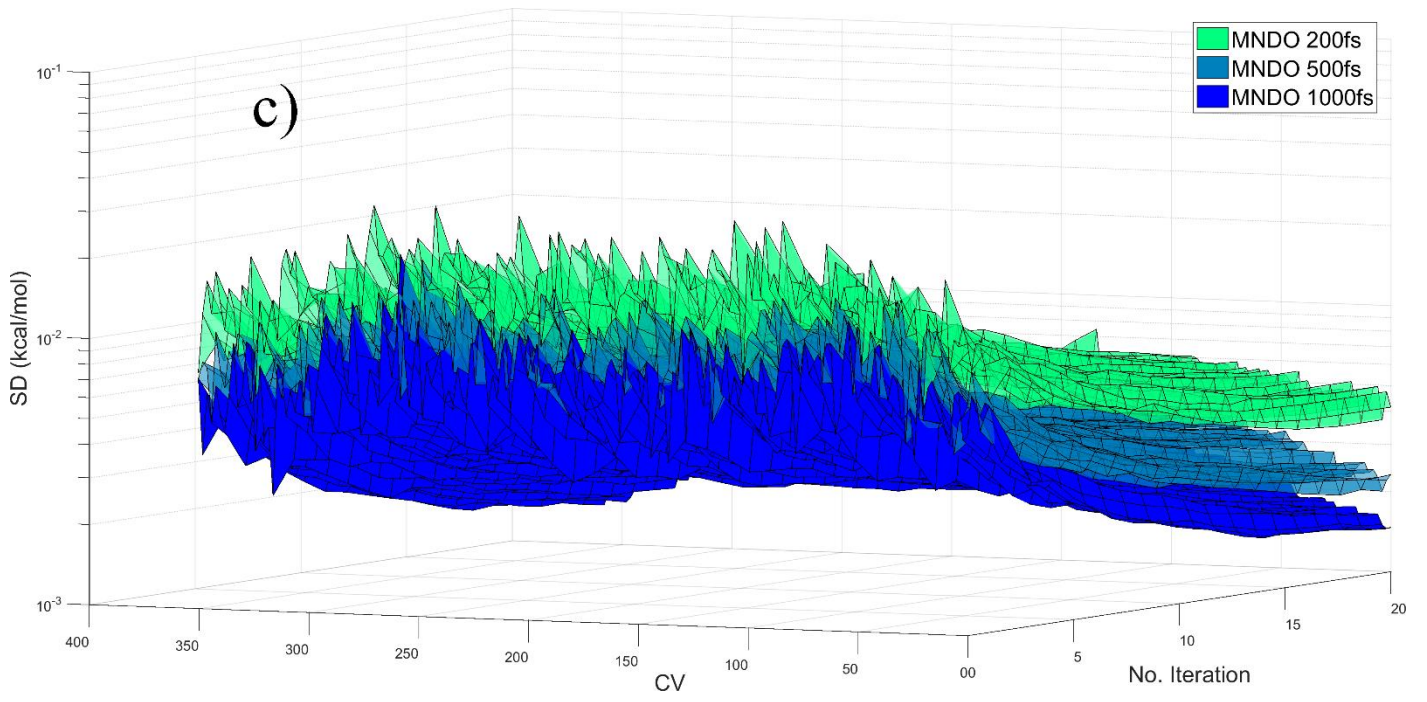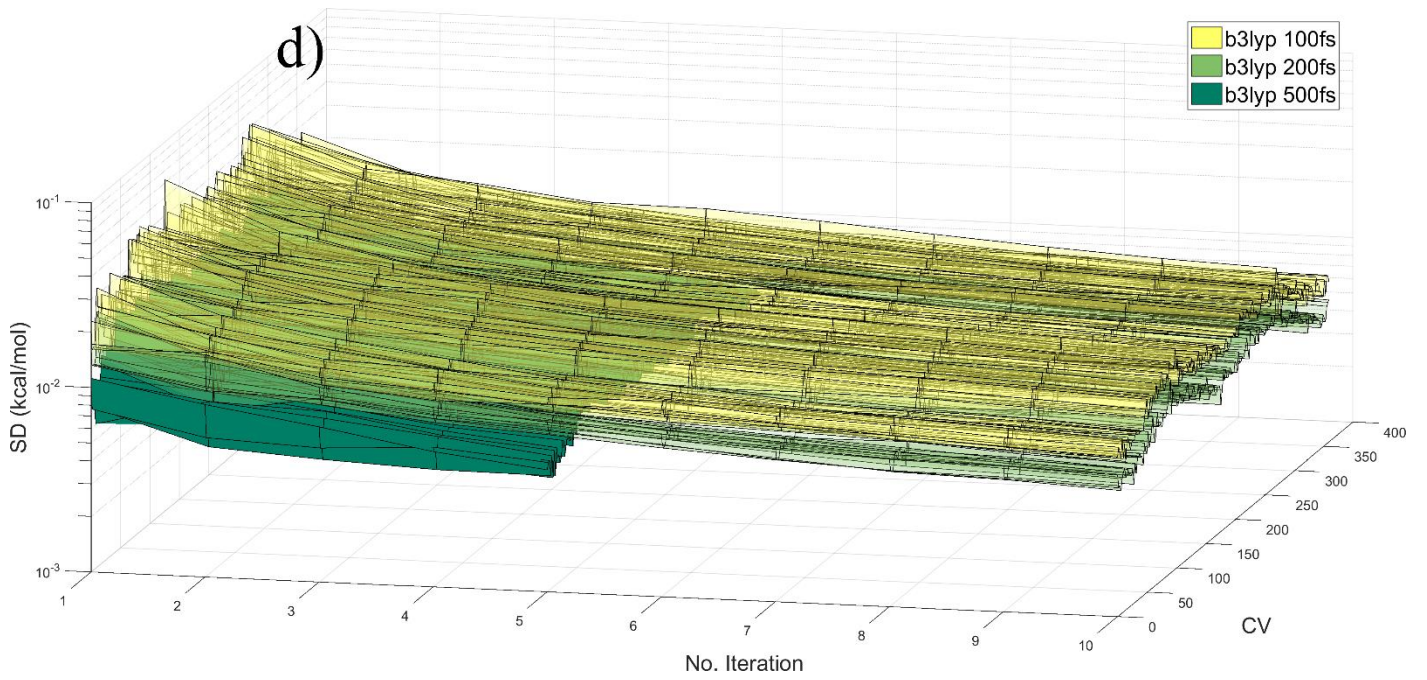

**Table S1.** Top: the computational times used in the construction of free energy profiles at SQM and ab initio QM levels under the pulling speed of 500 fs per segment. In the direct nonequilibrium free energy simulations under each Hamiltonian, we have 2 directions (forward and backward pulling), 180 segments (from 0°-360° with 2° increments), 50 nonequilibrium realizations per segment. As a result, there are 18000 pulling simulations per system. The Core Time is calculated as 500 fs/segment \* 18000 segment / 1,000,000 ns/fs / speed(ns/day) in Table 1.

Bottom: the computational times used in the SQM<->QM corrections under the pulling speed of 2 fs per segment. We have 2 directions (forward SQM-to-QM and backward QM-to-SQM pulling), 180 segments (from 0°-360° with 2° increments), 50 nonequilibrium realizations per segment. As a result, there are 18000 pulling simulations per system. The Core Time is calculated as 1 fs/segment \* 18000 segment / 1,000,000 ns/fs / speed(ns/day) in Table 1.

Note that the initial sampling is not included in this Table.

| Direct Free Energy Simulations |                   |      |      |         |              |         |          |
|--------------------------------|-------------------|------|------|---------|--------------|---------|----------|
| Level of Theory<br>Terms       | semi-empirical QM |      |      |         | ab initio QM |         |          |
|                                | AM1               | PM6  | MNDO | HF      | B3LYP        | MP2     | wB97XD   |
| Core Time (days)               | 0.19              | 0.19 | 0.19 | 647.16  | 3123.92      | 1390.61 | 4741.83  |
| Core Time (h)                  | 4.6               | 4.7  | 4.6  | 15531.7 | 74974.0      | 33374.5 | 113804.0 |
| Total (core-h)                 | 237698.2          |      |      |         |              |         |          |

| SQM<->QM corrections |        |       |      |        |        |       |      |         |         |          |         |         |
|----------------------|--------|-------|------|--------|--------|-------|------|---------|---------|----------|---------|---------|
| SQM to QM<br>Terms   | AM1 to |       |      |        | PM6 to |       |      |         | MNDO to |          |         |         |
|                      | HF     | B3LYP | MP2  | wB97XD | HF     | B3LYP | MP2  | wB97XD  | HF      | B3LYP    | MP2     | wB97XD  |
| Core Time (days)     | 1.29   | 6.25  | 2.78 | 9.48   | 1.29   | 6.25  | 2.78 | 9.48367 | 1.29431 | 6.247831 | 2.78121 | 9.48367 |
| Core Time (h)        | 31.1   | 149.9 | 66.7 | 227.6  | 31.1   | 149.9 | 66.7 | 227.6   | 31.1    | 149.9    | 66.7    | 227.6   |
| Total (core-h)       | 1426.1 |       |      |        |        |       |      |         |         |          |         |         |

**Table S2.** Relative free energy in kcal/mol at important points on the free energy profiles at ab initio QM levels obtained from direct and indirect schemes.

| Scheme \ Position | b3lyp from |      |      |      | HF from |      |      |      | MP2 from |      |      |      | wB97X-D from |      |      |      |
|-------------------|------------|------|------|------|---------|------|------|------|----------|------|------|------|--------------|------|------|------|
|                   | direct     | AM1  | PM6  | MNDO | direct  | AM1  | PM6  | MNDO | direct   | AM1  | PM6  | MNDO | direct       | AM1  | PM6  | MNDO |
| minimum at 0°     | 0.0        | 0.0  | 0.0  | 0.0  | 0.0     | 0.0  | 0.0  | 0.0  | 0.0      | 0.0  | 0.0  | 0.0  | 0.0          | 0.0  | 0.0  | 0.0  |
| peak at 90°       | 8.9        | 9.2  | 9.1  | 9.5  | 8.4     | 8.8  | 8.5  | 9.1  | 8.0      | 8.7  | 8.5  | 8.8  | 9.2          | 9.3  | 9.3  | 9.7  |
| minimum at 180°   | -7.0       | -6.5 | -7.1 | -6.4 | -8.0    | -6.9 | -7.3 | -6.1 | -7.6     | -6.5 | -7.3 | -6.1 | -6.8         | -6.1 | -6.6 | -5.5 |



**Table S3.** Efficiency comparison of direct and indirect free energy simulation at QM level. Total simulation time in direct scheme is given by  $N_{\text{segments}} * N_{\text{traj}} * (\phi_{\text{NEW}} + \phi_{\text{eq}})$ , while the total simulation time in the indirect scheme is the sum of  $N_{\text{segments,SQM}} * N_{\text{traj,SQM}} * (\phi_{\text{NEW,SQM}} + \phi_{\text{eq,SQM}})$  at SQM level and  $N_{\text{traj,SQM}\rightarrow\text{QM}} * (\phi_{\text{NEW,SQM}\rightarrow\text{QM}} + \phi_{\text{eq,SQM}}) + N_{\text{traj,QM}\rightarrow\text{SQM}} * (\phi_{\text{NEW,QM}\rightarrow\text{SQM}} + \phi_{\text{eq,QM}})$  in SQM $\leftrightarrow$ QM correction.  $N_{\text{segments}}$  is the number of segments and  $N_{\text{traj}}$  is the number of realizations per segment. The simulation time at QM level is scaled by the ratio of computational cost under QM Hamiltonian and that under SQM Hamiltonian in Table 1 to be the effective simulation time at SQM level, enabling direct comparison between computational costs. The computational cost of SQM $\rightarrow$ QM differs from QM $\rightarrow$ SQM, as the initial configuration sampling procedures proceed under different Hamiltonians. The computational-cost comparisons for all QM Hamiltonians reported in this work except B3LYP are included.

| Terms<br>Simulation  | $\phi_{\text{eq}}$ for each initial configuration (ps) | $\phi_{\text{NEW}}$ in each segment (ps) | Number of segments | Number of realizations per segment | Total simulation time (ps) scaled to SQM Hamiltonian | Relative efficiency |
|----------------------|--------------------------------------------------------|------------------------------------------|--------------------|------------------------------------|------------------------------------------------------|---------------------|
| direct SQM           | 0.05                                                   | 0.5x2=1                                  | 180                | 20                                 | 3780.00                                              | 3343.64             |
| SQM $\rightarrow$ HF | 0.05                                                   | 0.001                                    | 180                | 20                                 | 12217.10                                             | -                   |
| HF $\rightarrow$ SQM | 0.05                                                   | 0.001                                    | 180                | 20                                 | 613892.28                                            | -                   |
| indirect HF          | -                                                      | -                                        | -                  | -                                  | 629889.39                                            | 20.07               |
| direct HF            | 0.05                                                   | 0.5x2=1                                  | 180                | 20                                 | 12638958.80                                          | 1.00                |

| Terms<br>Simulation   | $\phi_{\text{eq}}$ for each initial configuration (ps) | $\phi_{\text{NEW}}$ in each segment (ps) | Number of segments | Number of realizations per segment | Total simulation time (ps) scaled to SQM Hamiltonian | Relative efficiency |
|-----------------------|--------------------------------------------------------|------------------------------------------|--------------------|------------------------------------|------------------------------------------------------|---------------------|
| direct SQM            | 0.05                                                   | 0.5x2=1                                  | 180                | 20                                 | 3780.00                                              | 7184.80             |
| SQM $\rightarrow$ MP2 | 0.05                                                   | 0.001                                    | 180                | 20                                 | 26045.27                                             | -                   |
| MP2 $\rightarrow$ SQM | 0.05                                                   | 0.001                                    | 180                | 20                                 | 1319128.55                                           | -                   |
| indirect MP2          | -                                                      | -                                        | -                  | -                                  | 1348953.82                                           | 20.13               |
| direct MP2            | 0.05                                                   | 0.5x2=1                                  | 180                | 20                                 | 27158529.05                                          | 1.00                |

| Terms<br>Simulation | $\phi_{\text{eq}}$ for each<br>initial<br>configuration<br>(ps) | $\phi_{\text{NEW}}$ in<br>each<br>segment<br>(ps) | Number of<br>segments | Number of<br>realizations per<br>segment | Total simulation<br>time (ps) scaled to<br>SQM Hamiltonian | Relative<br>efficiency |
|---------------------|-----------------------------------------------------------------|---------------------------------------------------|-----------------------|------------------------------------------|------------------------------------------------------------|------------------------|
| direct SQM          | 0.05                                                            | 0.5x2=1                                           | 180                   | 20                                       | 3780.00                                                    | 24499.47               |
| SQM->wB97XD         | 0.05                                                            | 0.001                                             | 180                   | 20                                       | 88378.10                                                   | -                      |
| wB97XD->SQM         | 0.05                                                            | 0.001                                             | 180                   | 20                                       | 4498103.27                                                 | -                      |
| indirect<br>wB97XD  | -                                                               | -                                                 | -                     | -                                        | 4590261.37                                                 | 20.17                  |
| direct wB97XD       | 0.05                                                            | 0.5x2=1                                           | 180                   | 20                                       | 92608008.43                                                | 1.00                   |
